# Supplementary material for: Micro-encapsulated pirimiphos-methyl shows high insecticidal efficacy and long residual activity against pyrethroid-resistant malaria vectors in central Côte d’Ivoire
Source: PubMed Central journal article supplement (PMC4159530; doi:10.1186/1475-2875-13-332), 2014-08-25
Supplement: 12936_2014_3370_MOESM2_ESM.pdf [file 12936_2014_3370_MOESM2_ESM.pdf]

## Additional file 2: Alternative presentation of experimental hut results.

**Table 2.1 Summary table.** Summary of results for *An. gambiae* s.l., *An. funestus* and non-anopheline genera of the experimental hut trial, following the analysis and analysis used in Tables 1 – 2 in [10].

| Species               | Material       | Treatment           | Total collected | % Caught in veranda (95%CI) | % Bloodfed (95%CI) | % Mortality (95%CI)      | % Corrected mortality (95%CI) |                          |            |
|-----------------------|----------------|---------------------|-----------------|-----------------------------|--------------------|--------------------------|-------------------------------|--------------------------|------------|
| <i>An. gambiae</i>    | Cement         | Untreated           | 4776            | 38a (37-39)                 | 80a (78-81)        | 18a (17-19)              | -                             |                          |            |
|                       |                | CS AA               | 2822            | 47b (45-49)                 | 74b (73-76)        | 65b (64-67)              | 58 (56-60)                    |                          |            |
|                       |                | CS B                | 2434            | 45b (43-47)                 | 71bc (70-73)       | 75c (73-77)              | 70 (68-72)                    |                          |            |
|                       |                | CS BM               | 3893            | 46b (45-48)                 | 79a (77-80)        | 75c (74-77)              | 70 (68-72)                    |                          |            |
|                       |                | Actellic 50 EC      | 3041            | 45b (43-47)                 | 80a (78-81)        | 57d (55-59)              | 48 (45-50)                    |                          |            |
|                       |                | ICON 10 CS          | 5019            | 73c (72-74)                 | 70c (69-72)        | 44e (43-46)              | 33 (31-35)                    |                          |            |
|                       | Mud            | Untreated           | 5710            | 40ab (39-41)                | 70a (69-71)        | 16a (15-17)              | -                             |                          |            |
|                       |                | CS AA               | 4569            | 41ab (40-43)                | 70a (69-72)        | 53b (51-54)              | 43 (42-45)                    |                          |            |
|                       |                | CS B                | 3893            | 41ab (40-43)                | 75b (74-76)        | 66c (65-68)              | 60 (58-61)                    |                          |            |
|                       |                | CS BM               | 4337            | 39ab (38-41)                | 75b (73-76)        | 66c (65-67)              | 60 (58-61)                    |                          |            |
|                       |                | Actellic 50 EC      | 3694            | 43b (41-44)                 | 75b (73-76)        | 53b (51-55)              | 44 (42-46)                    |                          |            |
|                       |                | ICON 10 CS          | 5959            | 65c (63-66)                 | 62c (60-63)        | 34d (33-36)              | 22 (20-23)                    |                          |            |
|                       |                | <i>An. funestus</i> | Cement          | Untreated                   | 341                | 26a (22-31)              | 86a (82-90)                   | 34a (29-39)              | -          |
|                       |                |                     |                 | CS AA                       | 104                | 25a (17-34)              | 70bc (60-79)                  | 88b (81-94)<br>83bc (73- | 83 (73-91) |
| CS B                  | 83             |                     |                 | 27a (17-37)                 | 72bc (61-82)       | 90)                      | 75 (62-86)                    |                          |            |
| CS BM                 | 125            |                     |                 | 36a (28-45)                 | 70bc (62-78)       | 87b (80-93)              | 81 (71-89)                    |                          |            |
| Actellic 50 EC        | 122            |                     |                 | 32a (24-41)                 | 82ab (74-88)       | 72c (63-80)<br>75bc (67- | 58 (45-70)                    |                          |            |
| Mud                   | ICON 10 CS     |                     | 137             | 64b (55-72)                 | 55c (47-64)        | 82)                      | 62 (51-73)                    |                          |            |
|                       | Untreated      |                     | 306             | 31a (26-37)                 | 77a (72-82)        | 33a (28-39)              | -                             |                          |            |
|                       | CS AA          |                     | 235             | 33a (27-39)                 | 78a (72-83)        | 82b (77-87)              | 73 (65-80)                    |                          |            |
|                       | CS B           |                     | 183             | 30a (24-37)                 | 72ab (64-78)       | 86b (80-91)              | 79 (72-87)                    |                          |            |
|                       | CS BM          |                     | 215             | 32a (25-38)                 | 63b (56-70)        | 85b (80-90)              | 78 (70-85)                    |                          |            |
| Non-anopheline Genera | Cement         | Actellic 50 EC      | 160             | 24a (18-32)                 | 74ab (66-80)       | 81b (74-87)              | 72 (62-81)                    |                          |            |
|                       |                | ICON 10 CS          | 177             | 61b (53-68)                 | 66a (58-73)        | 64c (56-71)              | 46 (34-57)                    |                          |            |
|                       |                | Untreated           | 1608            | 59a (57-62)                 | 59a (56-61)        | 9a (7-10)                | -                             |                          |            |
|                       |                | CS AA               | 1202            | 52b (49-55)                 | 50b (47-53)        | 37b (34-39)              | 31 (27-34)                    |                          |            |
|                       |                | CS B                | 1301            | 54ab (52-57)                | 46b (44-49)        | 38b (35-40)              | 32 (29-35)                    |                          |            |
|                       | Mud            | CS BM               | 1691            | 56ab (54-59)                | 57a (55-60)        | 40b (38-42)              | 34 (31-37)                    |                          |            |
|                       |                | Actellic 50 EC      | 1704            | 58a (56-60)                 | 61a (59-64)        | 32c (30-34)              | 25 (23-28)                    |                          |            |
|                       |                | ICON 10 CS          | 959             | 49b (46-53)                 | 16c (14-18)        | 62d (59-65)              | 58 (55-61)                    |                          |            |
|                       |                | Untreated           | 3884            | 54a (53-56)                 | 61a (60-63)        | 11a (10-12)              | -                             |                          |            |
|                       |                | CS AA               | 2279            | 54a (52-56)                 | 67b (65-68)        | 34b (32-36)              | 26 (23-28)                    |                          |            |
| Mud                   | CS B           | 2519                | 59b (57-61)     | 74c (72-75)                 | 32b (30-34)        | 23 (21-25)               |                               |                          |            |
|                       | CS BM          | 2843                | 55a (53-56)     | 66b (64-67)                 | 41c (39-42)        | 33 (31-35)               |                               |                          |            |
|                       | Actellic 50 EC | 2264                | 54a (52-56)     | 64ab (62-66)                | 32b (30-34)        | 24 (21-26)               |                               |                          |            |
|                       | ICON 10 CS     | 1170                | 43c (40-46)     | 25d (22-27)                 | 58d (55-61)        | 53 (50-56)               |                               |                          |            |

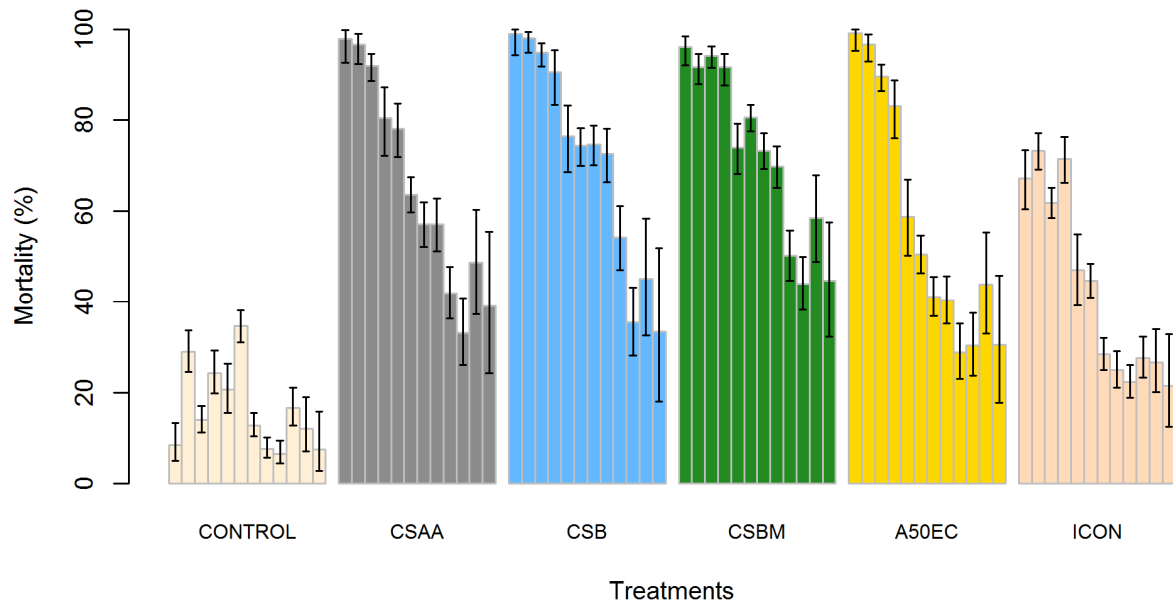

**Figure 2.1. Crude mortality of *An. gambiae* s.l. in cement huts by month post treatment.** The first month is on the left. Error bars show 95% confidence intervals. This presentation allows comparison of the results of this trial with those presented in [10].

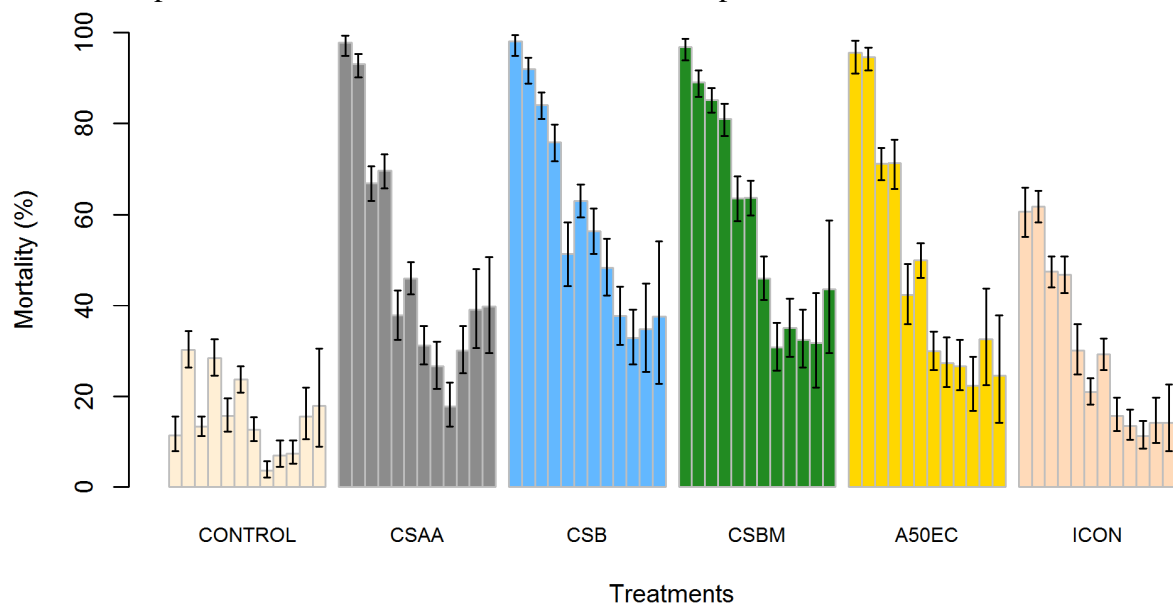

**Figure 2.2. Crude mortality of *An. gambiae* s.l. in mud huts by month post treatment.** See Figure 2.1 for legend.

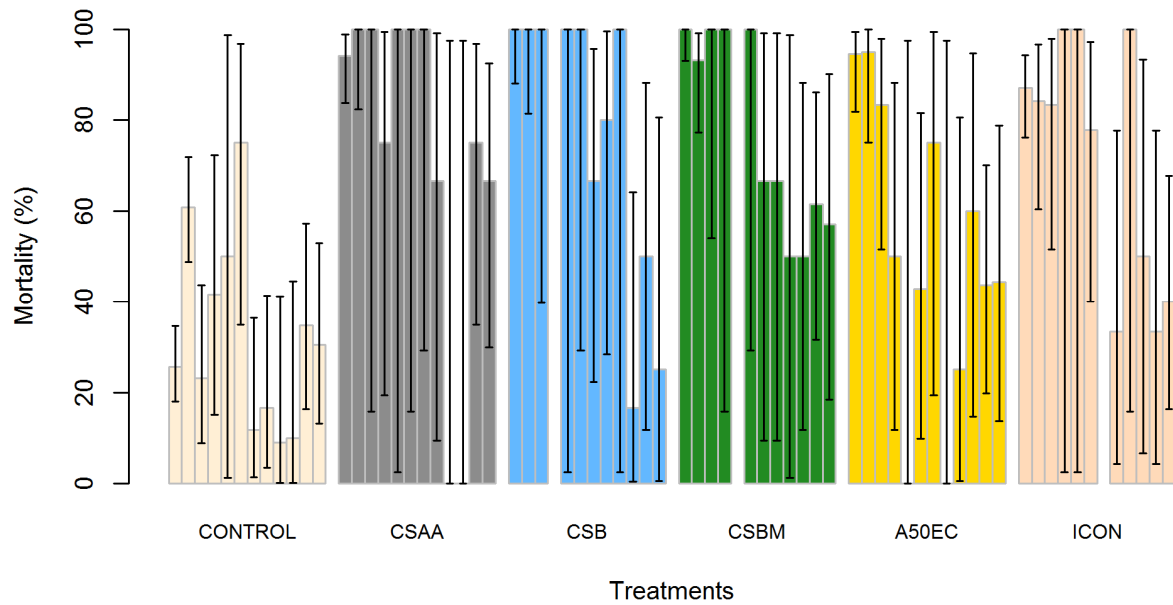

**Figure 2.3. Crude mortality of *An. funestus* in cement huts by month post treatment.** See Figure 2.1 for legend.

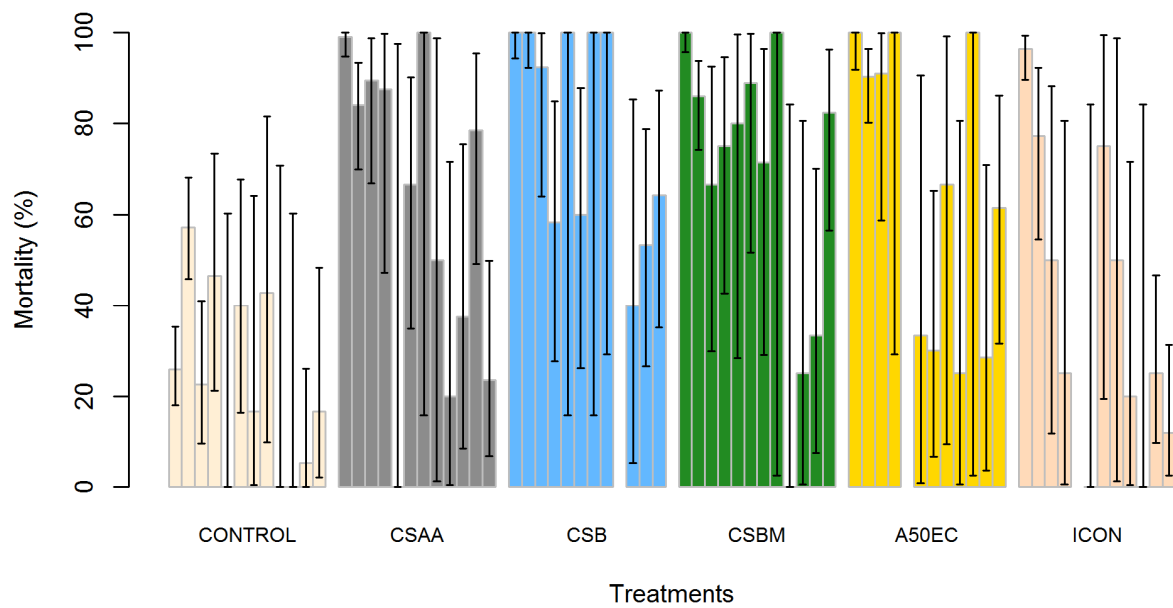

**Figure 2.4. Crude mortality of *An. funestus* in mud huts by month post treatment.** See Figure 2.1 for legend.

Mortality of *An. funestus* in mud huts

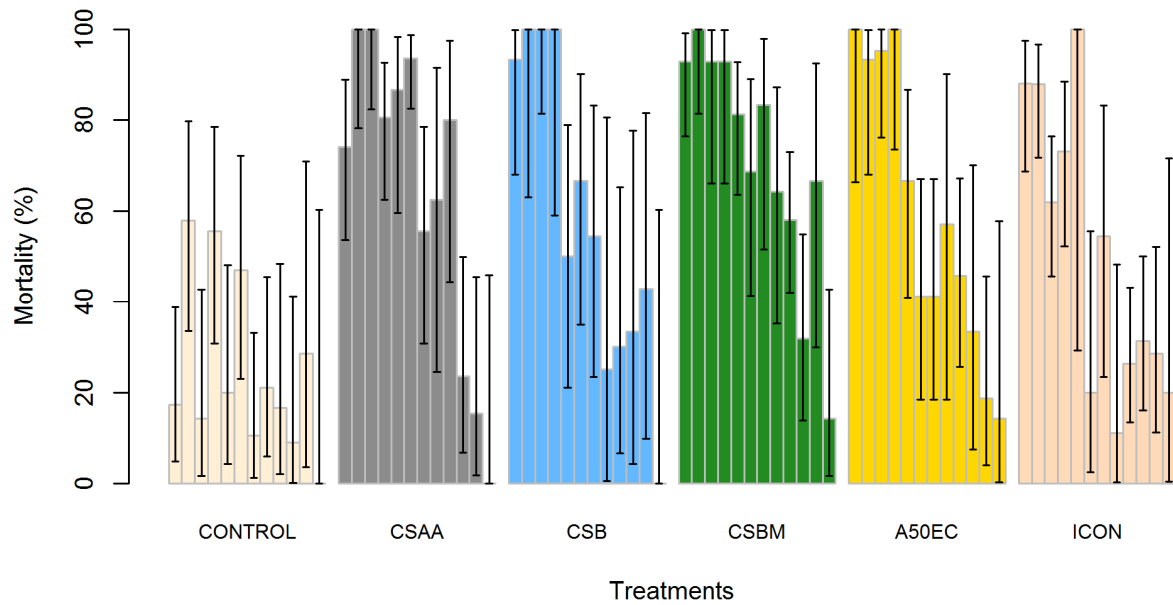

**Figure 2.5. Crude mortality of anophelines other than *An. gambiae* or *An. funestus* in cement huts by month post treatment.** See Figure 2.1 for legend.

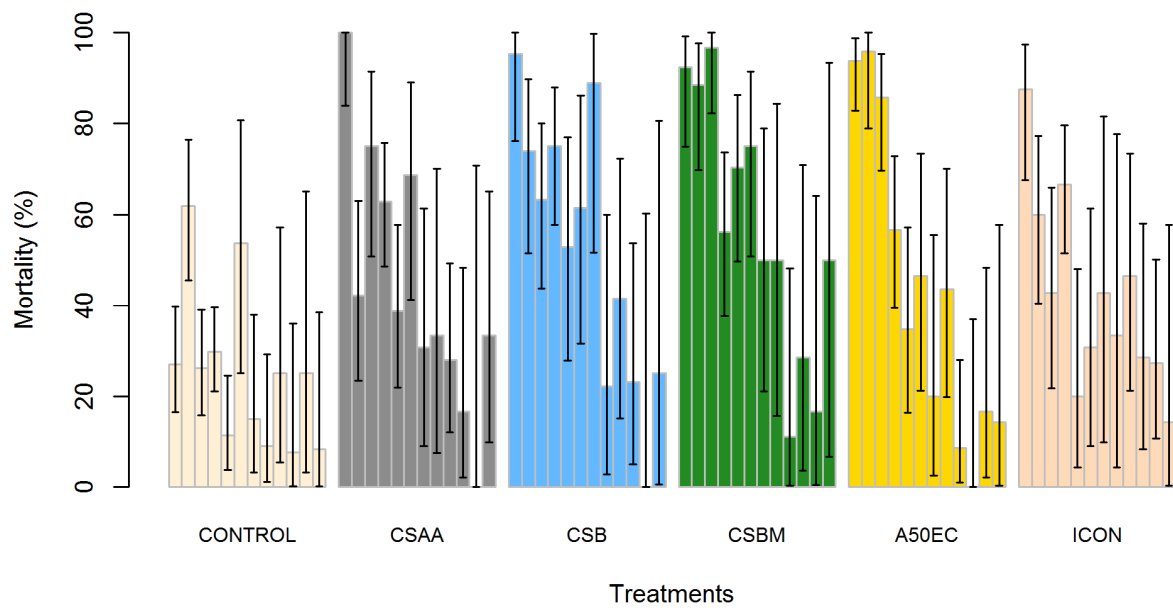

**Figure 2.6. Crude mortality of anophelines other than *An. gambiae* or *An. funestus* in mud huts by month post treatment.** See Figure 2.1 for legend.

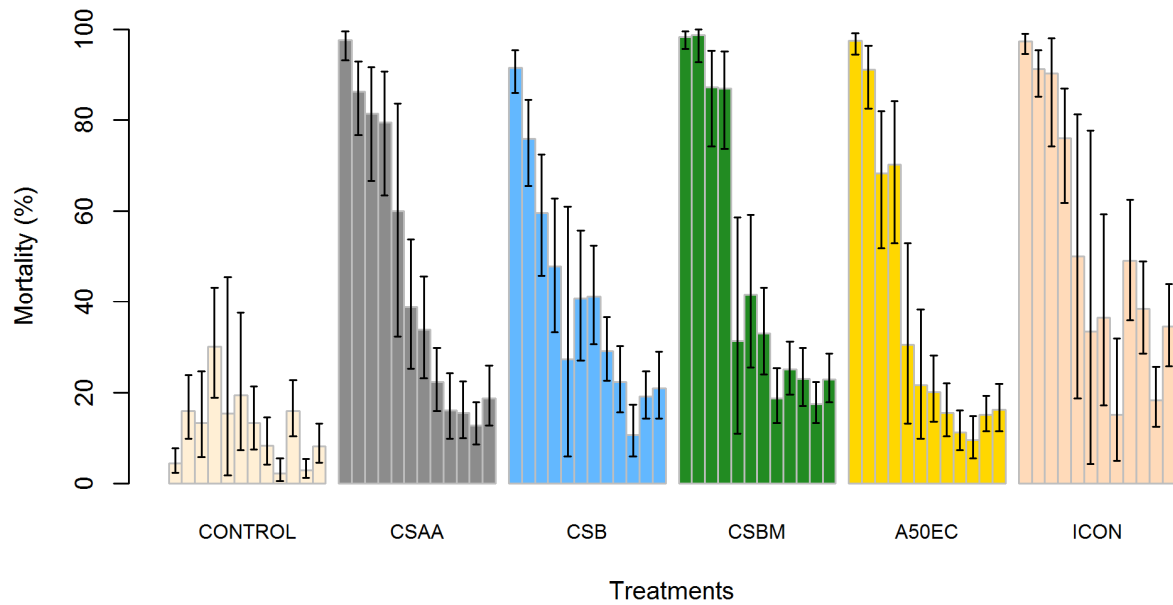

Mortality of non-anopheline genera in cement huts

**Figure 2.7. Crude mortality of non-anopheline taxa in cement huts by month post treatment.** See Figure 2.1 for legend.

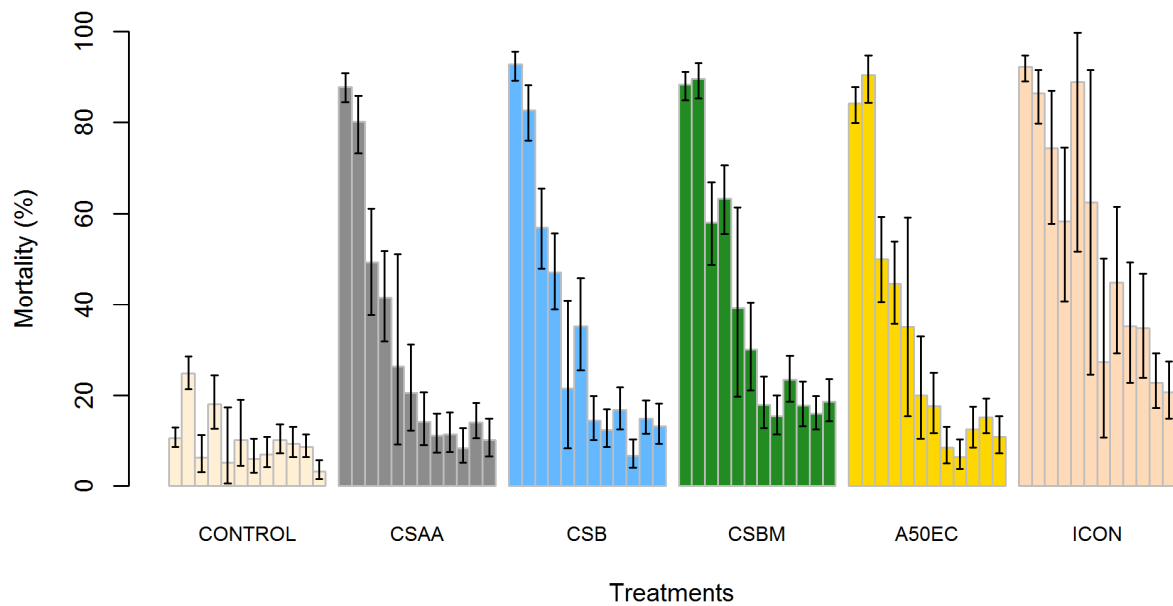

**Figure 2.7. Crude mortality of non-anopheline taxa in mud huts by month post treatment.** See Figure 2.1 for legend.
