# Supplementary material for: Micro-encapsulated pirimiphos-methyl shows high insecticidal efficacy and long residual activity against pyrethroid-resistant malaria vectors in central Côte d’Ivoire
Source: PubMed Central journal article supplement (PMC4159530; doi:10.1186/1475-2875-13-332), 2014-08-25

**Additional file 10. Effects of pirimiphos-methyl and lambda-cyhalothrin on anophelines other than *An. gambiae* s.l. and *An. funestus***

Legend: See Figure 3.

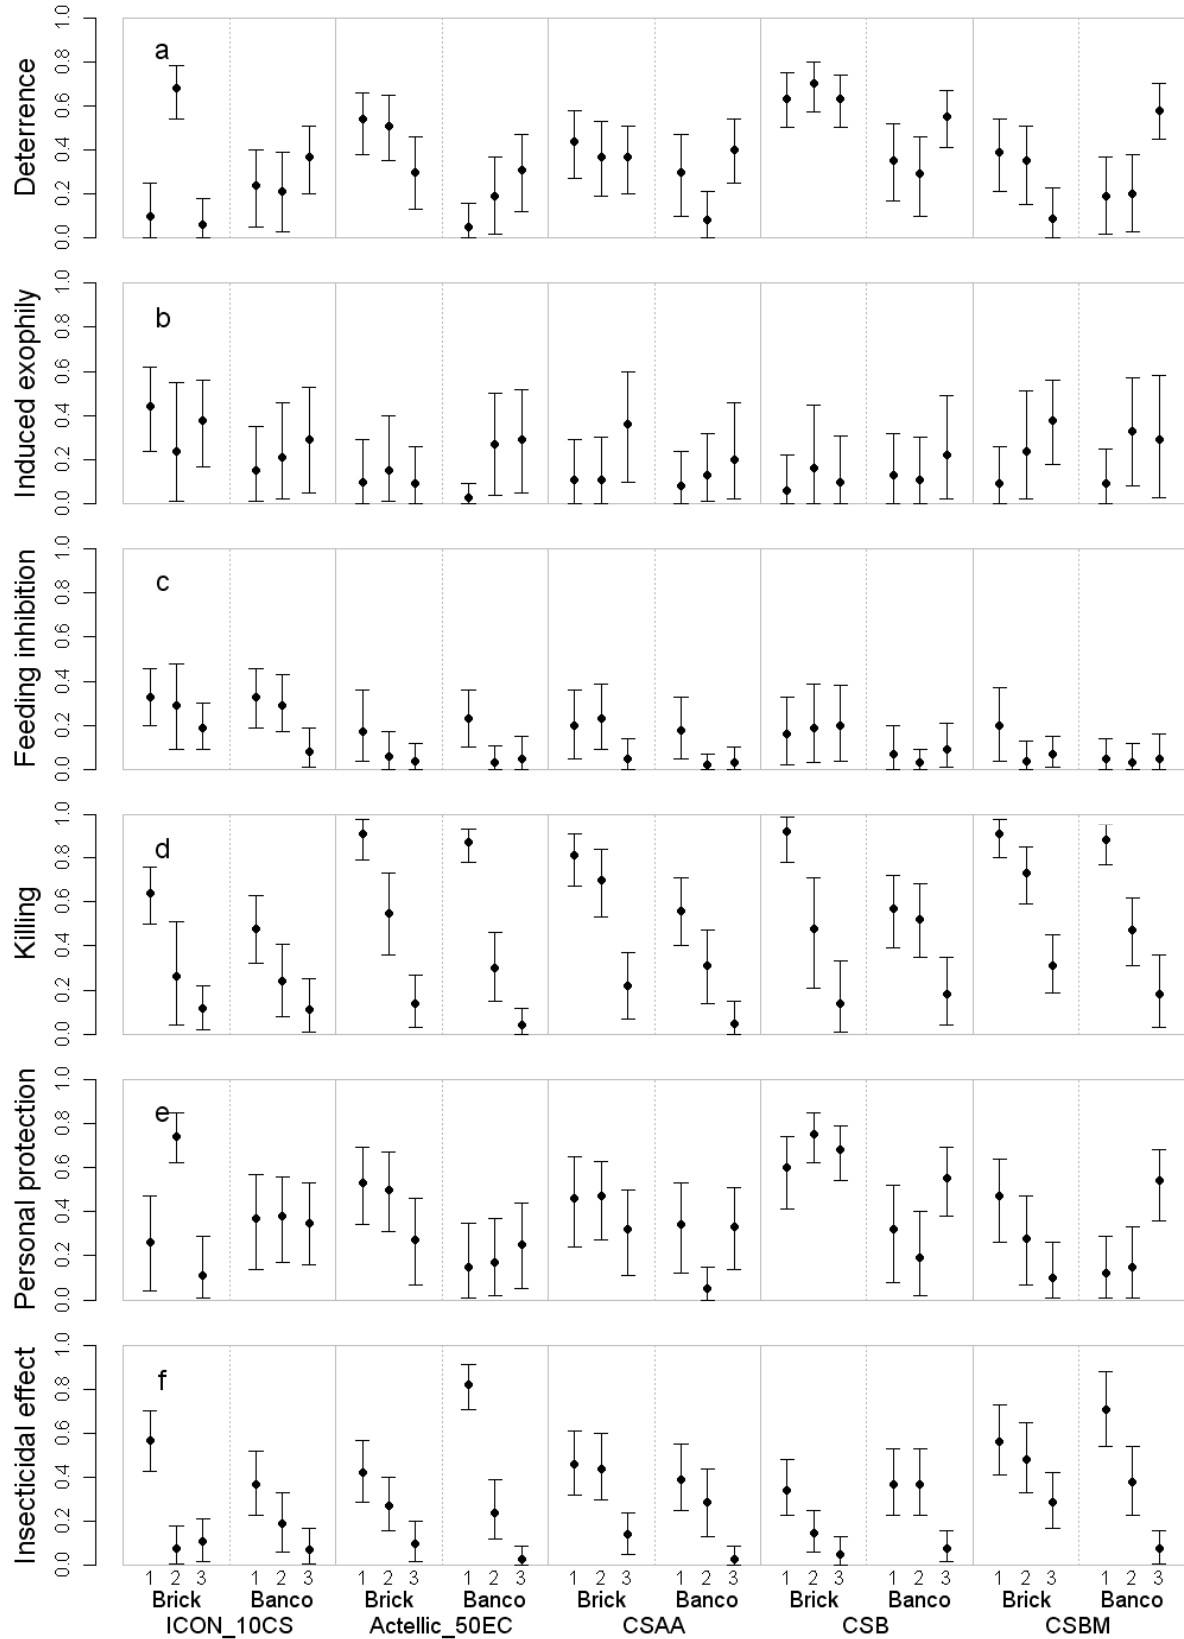

Supplement: 12936_2014_3370_MOESM10_ESM.pdf [file 12936_2014_3370_MOESM10_ESM.pdf]
