# Supplementary material for: Micro-encapsulated pirimiphos-methyl shows high insecticidal efficacy and long residual activity against pyrethroid-resistant malaria vectors in central Côte d’Ivoire
Source: PubMed Central journal article supplement (PMC4159530; doi:10.1186/1475-2875-13-332), 2014-08-25

**Additional file 11. Odds ratio of overall insecticidal effect of pirimiphos-methyl relative to lambda-cyhalothrin on *An. funestus***  
 Legend: See Figure 4.

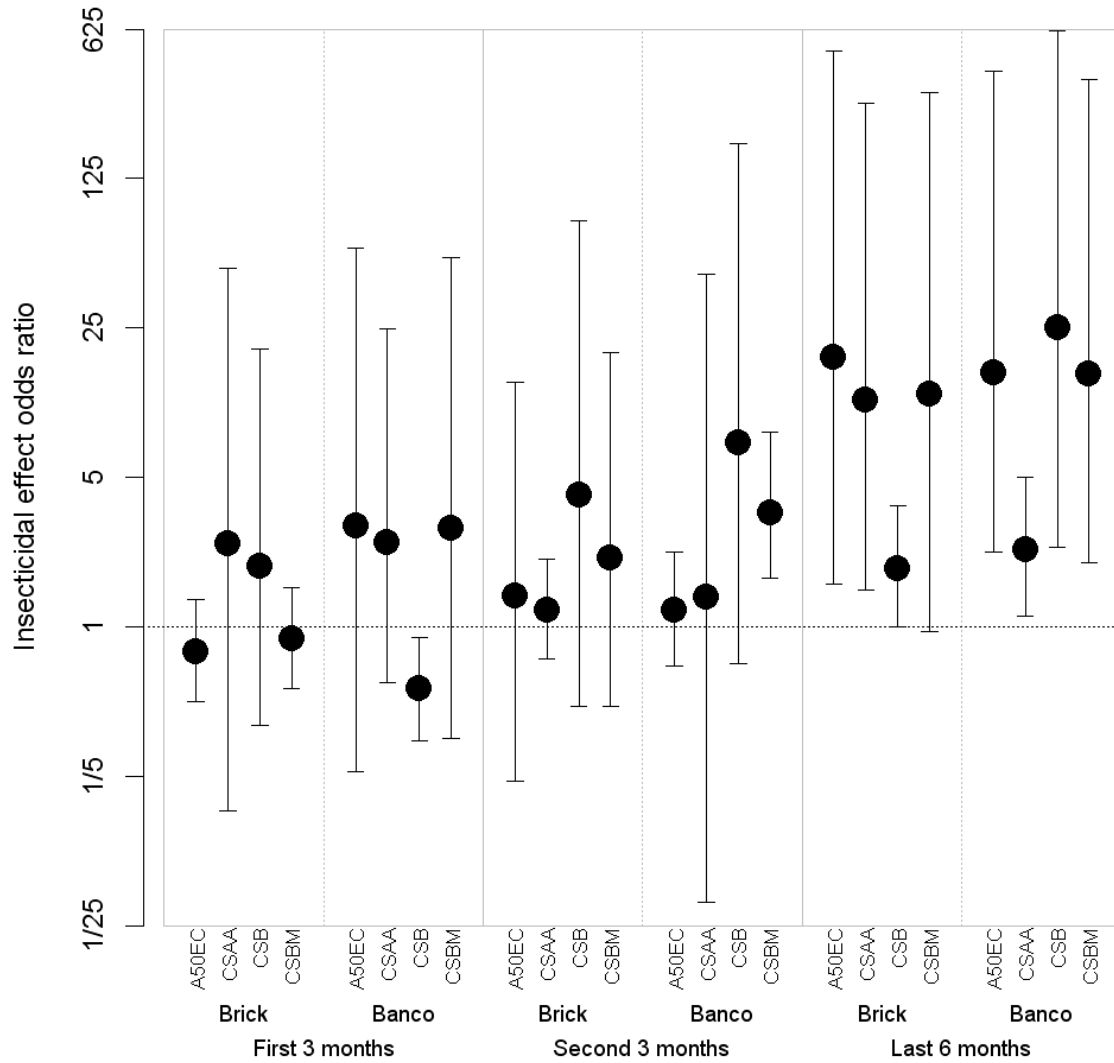

Supplement: 12936_2014_3370_MOESM11_ESM.pdf [file 12936_2014_3370_MOESM11_ESM.pdf]
