# Supplementary material for: Micro-encapsulated pirimiphos-methyl shows high insecticidal efficacy and long residual activity against pyrethroid-resistant malaria vectors in central Côte d’Ivoire
Source: PubMed Central journal article supplement (PMC4159530; doi:10.1186/1475-2875-13-332), 2014-08-25
Supplement: 12936_2014_3370_MOESM13_ESM.pdf [file 12936_2014_3370_MOESM13_ESM.pdf]

**Additional file 13: Perceived strengths and weakness of different insecticide formulations in experimental huts.**

| Product               | Wall type | Odor (1=very strong, 7=very weak) |                |      | Efficacy (1= very strong, 7=very weak) |                |      | Pleasant (1= very pleasant, 7=not pleasant) |                |      | Not dangerous (1= very dangerous, 7=not dangerous) |                |      | Used to (1= easily get used to, 7= trouble getting used to) |                |      |
|-----------------------|-----------|-----------------------------------|----------------|------|----------------------------------------|----------------|------|---------------------------------------------|----------------|------|----------------------------------------------------|----------------|------|-------------------------------------------------------------|----------------|------|
|                       |           | Mean                              | 95% Conf. Int. |      | Mean                                   | 95% Conf. Int. |      | Mean                                        | 95% Conf. Int. |      | Mean                                               | 95% Conf. Int. |      | Mean                                                        | 95% Conf. Int. |      |
| <b>Untreated</b>      | Mud       | 5.43                              | 4.76           | 6.10 | 4.90                                   | 4.07           | 5.73 | 6.18                                        | 5.58           | 6.78 | 4.28                                               | 3.40           | 5.15 | 4.50                                                        | 3.67           | 5.33 |
|                       | Cement    | 5.89                              | 4.89           | 6.90 | 6.05                                   | 5.23           | 6.88 | 5.57                                        | 3.98           | 7.16 | 3.00                                               | 1.86           | 4.14 | 3.26                                                        | 2.01           | 4.52 |
| <b>CS B</b>           | Mud       | 5.61*                             | 5.44           | 5.78 | 5.49 *                                 | 5.31           | 5.67 | 5.35                                        | 5.18           | 5.53 | 3.86                                               | 3.68           | 4.04 | 3.89                                                        | 3.71           | 4.07 |
|                       | Cement    | 5.05                              | 4.81           | 5.28 | 5.06                                   | 4.82           | 5.30 | 4.48                                        | 4.18           | 4.79 | 2.63                                               | 2.41           | 2.85 | 2.77                                                        | 2.54           | 3.00 |
| <b>ICON 10 CS</b>     | Mud       | 5.81                              | 5.65           | 5.97 | 5.69                                   | 5.52           | 5.86 | 5.44                                        | 5.26           | 5.62 | 3.79                                               | 3.60           | 3.98 | 3.90                                                        | 3.71           | 4.09 |
|                       | Cement    | 5.16                              | 4.92           | 5.40 | 5.19                                   | 4.95           | 5.43 | 4.22                                        | 3.90           | 4.53 | 2.86                                               | 2.62           | 3.10 | 2.84                                                        | 2.60           | 3.08 |
| <b>CS BM</b>          | Mud       | 5.81                              | 5.65           | 5.97 | 5.67                                   | 5.50           | 5.84 | 5.29                                        | 5.10           | 5.48 | 3.80                                               | 3.61           | 3.99 | 3.82                                                        | 3.64           | 4.01 |
|                       | Cement    | 4.76**                            | 4.50           | 5.02 | 4.76**                                 | 4.50           | 5.02 | 3.98                                        | 3.65           | 4.31 | 2.55                                               | 2.33           | 2.78 | 2.52                                                        | 2.29           | 2.75 |
| <b>Actellic 50 EC</b> | Mud       | 5.75                              | 5.59           | 5.92 | 5.61                                   | 5.44           | 5.79 | 5.24                                        | 5.04           | 5.44 | 3.73                                               | 3.54           | 3.92 | 3.74                                                        | 3.56           | 3.93 |
|                       | Cement    | 5.29                              | 5.05           | 5.52 | 5.24                                   | 5.00           | 5.48 | 3.96                                        | 3.65           | 4.27 | 2.78                                               | 2.54           | 3.01 | 2.74                                                        | 2.51           | 2.98 |
| <b>CS AA</b>          | Mud       | 5.81                              | 5.66           | 5.97 | 5.59                                   | 5.41           | 5.77 | 5.29 *                                      | 5.09           | 5.48 | 3.73*                                              | 3.54           | 3.92 | 3.68*                                                       | 3.49           | 3.87 |
|                       | Cement    | 5.70                              | 5.49           | 5.91 | 5.59                                   | 5.37           | 5.81 | 3.85**                                      | 3.51           | 4.19 | 2.28**                                             | 2.07           | 2.49 | 2.36**                                                      | 2.15           | 2.58 |

\* Best value for 'Mud'.

\*\* Best value for 'Cement'
